# Supplementary material for: Bubble–surface interactions with graphite in the presence of adsorbed carboxymethylcellulose
Source: Royal Society of Chemistry journal article supplement (doi:10.1039/c4sm02380c), 2014-11-19
Supplement: c4sm02380c1.pdf [file c4sm02380c1.pdf]

Electronic Supplementary Information for

# Bubble-Surface Interactions with Graphite in the Presence of Adsorbed Carboxymethylcellulose

*Jueying Wu<sup>1, 2</sup>, Iliana Delcheva<sup>1</sup>, Yung Ngothai<sup>2</sup>, Marta Krasowska<sup>1\*</sup>, David A. Beattie<sup>1\*</sup>*

<sup>1</sup>Ian Wark Research Institute, University of South Australia, Mawson Lakes SA 5095,  
Australia.

<sup>2</sup>School of Chemical Engineering, University of Adelaide, Adelaide SA 5005, Australia;

\* Corresponding Authors: Email: [Marta.Krasowska@unisa.edu.au](mailto:Marta.Krasowska@unisa.edu.au), Telephone number: +61 8  
8302 6861 (Marta Krasowska); Email: [David.Beattie@unisa.edu.au](mailto:David.Beattie@unisa.edu.au), Telephone number: +61  
8 8302 3676 (David A. Beattie).

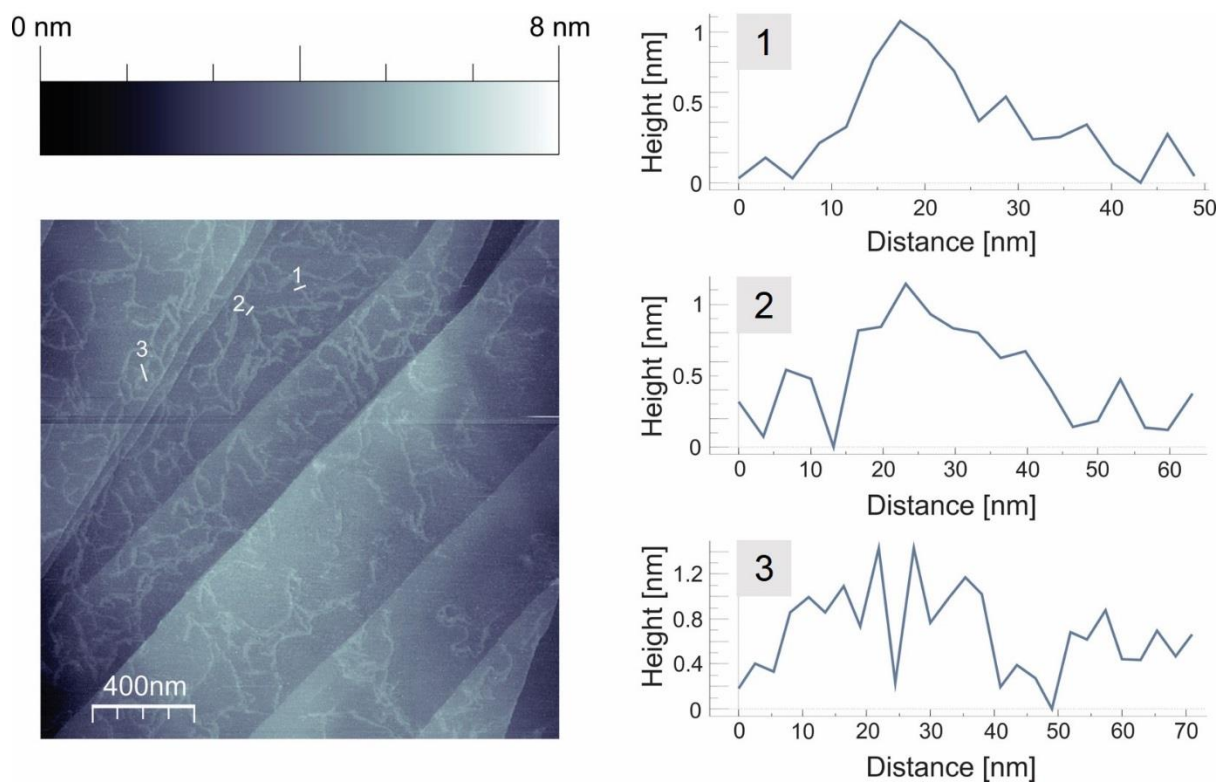

**Figure SI 1.** Left panel:  $2 \times 2 \mu\text{m}^2$  AFM height image of CMC molecules on HOPG modified with  $5 \text{ mg}\cdot\text{L}^{-1}$  CMC solution in  $10^{-3} \text{ M}$  KCl at pH 9. Right panel: corresponding height profiles along the cross-sections 1, 2, and 3 as indicated in the AFM height image.

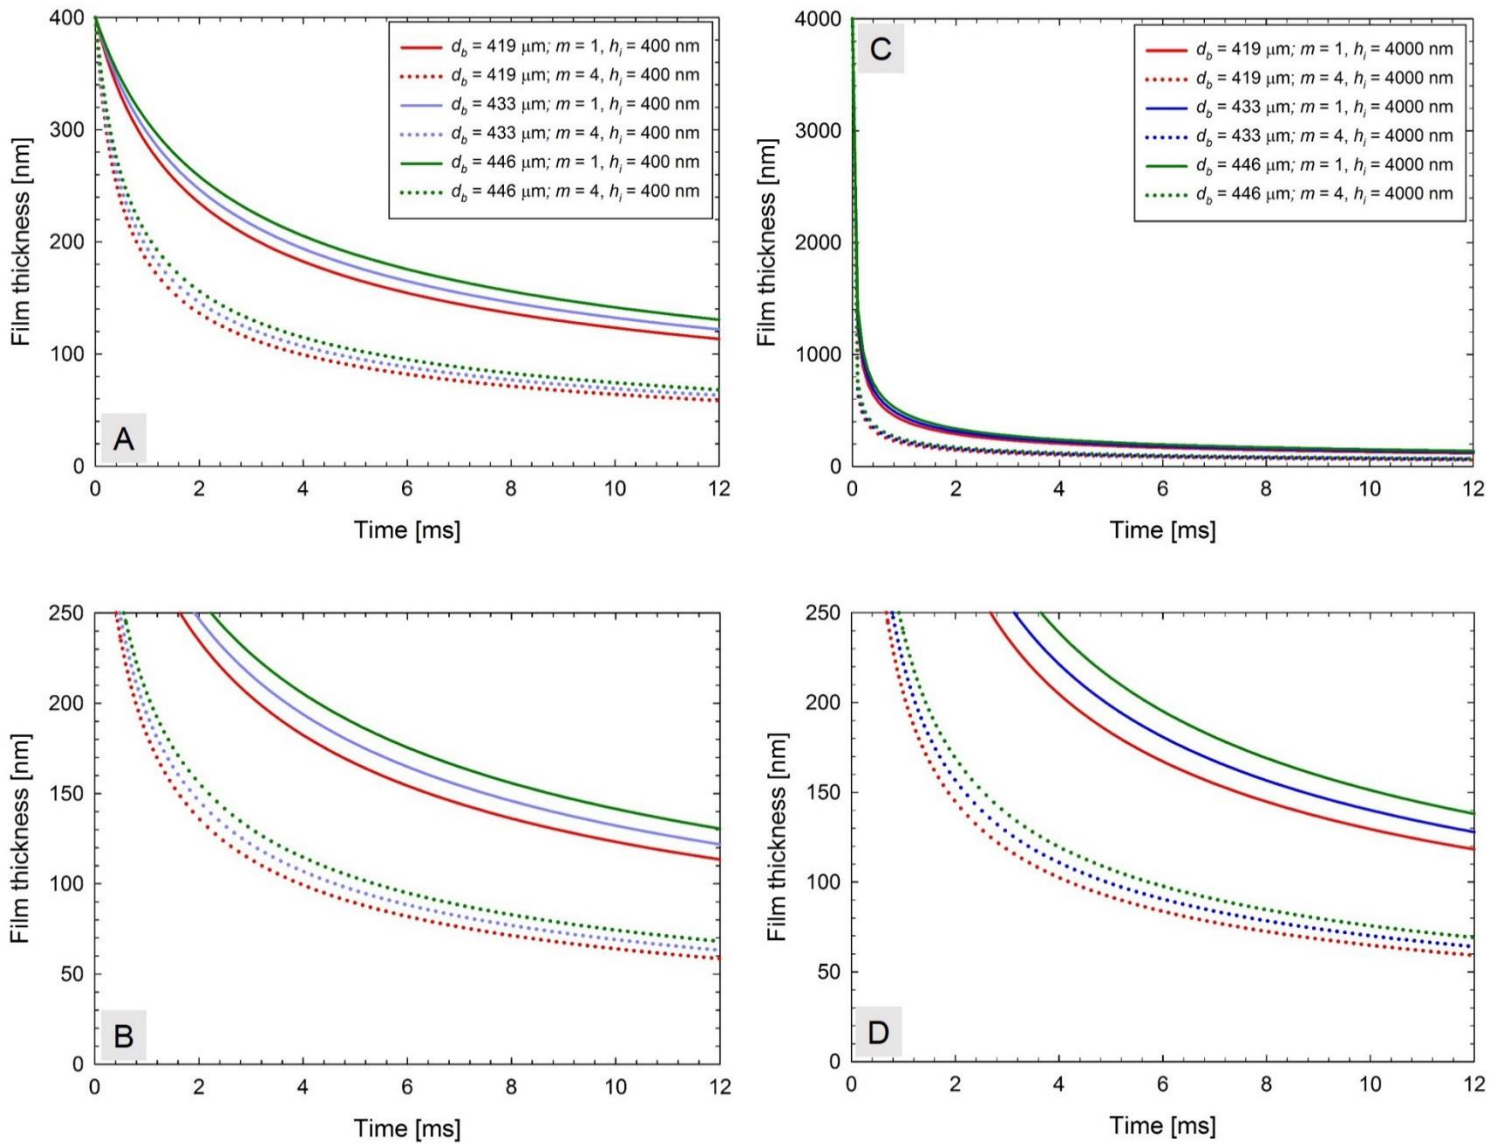

**Figure SI 2.** The film drainage calculated from Equation (5) for bubble diameters 419  $\mu\text{m}$  (red lines), 433  $\mu\text{m}$  (blue lines), and 446  $\mu\text{m}$  (green lines) assuming no slip ( $m = 1$ , solid lines) and full slip ( $m = 4$ , dotted lines) at the solution-gas interface. Plot (A) shows the film thickness versus time calculated for an initial film thickness of 400 nm. Plot (B) is an expanded view of a region in plot (A). Plot (C) presents film thickness versus time calculated for an initial film thickness of 4000 nm. Plot (D) is an expanded view of a region in plot (C).

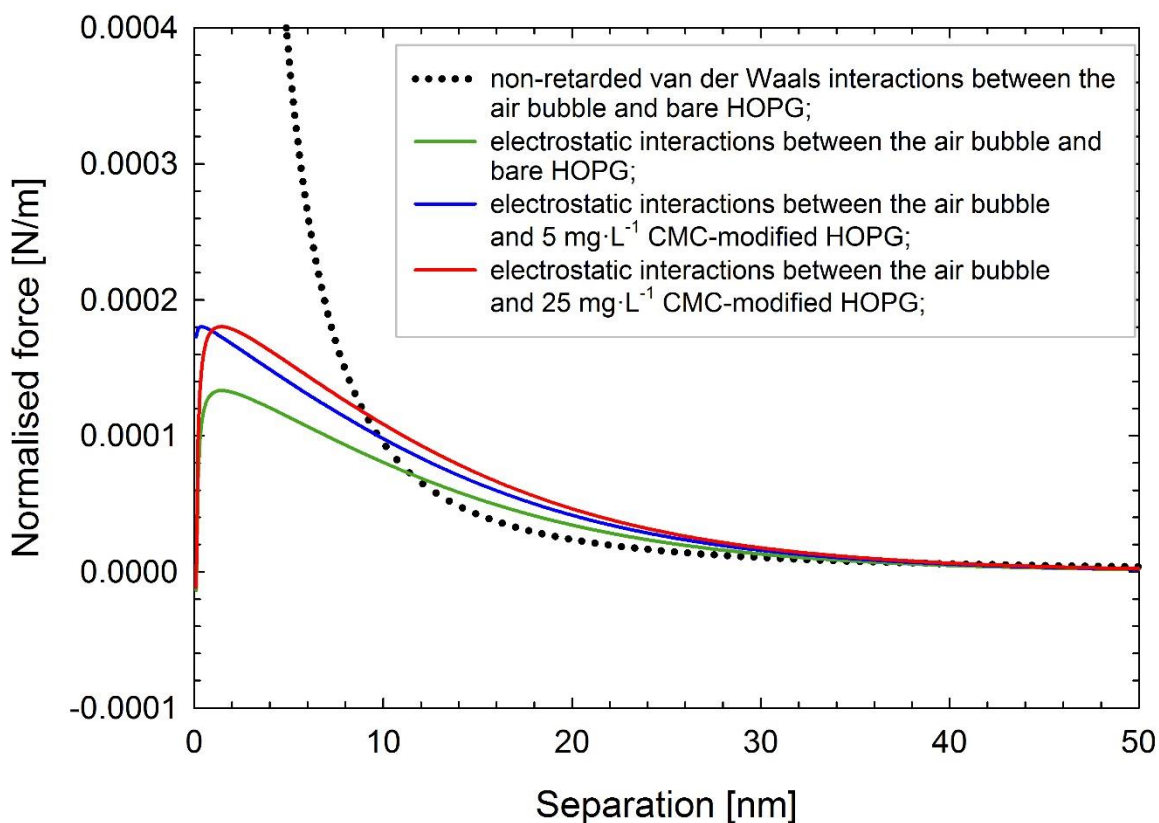

**Figure SI 3.** The normalized (in respect to bubble radius) interaction forces between an air bubble and HOPG surface. Non-retarded van der Waals interactions (dotted line) calculated for the sphere-flat surface geometry. The Hamaker coefficient used for HOPG-water-air system was:  $-5.68 \cdot 10^{-20}$  J [B. C. Donose, E. Taran, M. A. Hampton, S. I. Karakashev and A. V. Nguyen, *Adv. Powder Technol.*, 2009, **20**, 257-261]. The electrostatic interactions for all three systems were computed using constant potential boundary conditions and the Hogg-Healy-Fuerstenau (HHF) approximation. The measured zeta potentials of bare and CMC-modified HOPG surfaces were used in place of surface potentials. Zeta potential for the air bubble was taken as -50 mV [C. Yang, T. Dabros, D. Li, J. Czarnecki, J. Masliyah, *J. Colloid Interface Sci.*, 2001, **243**, 128-135].

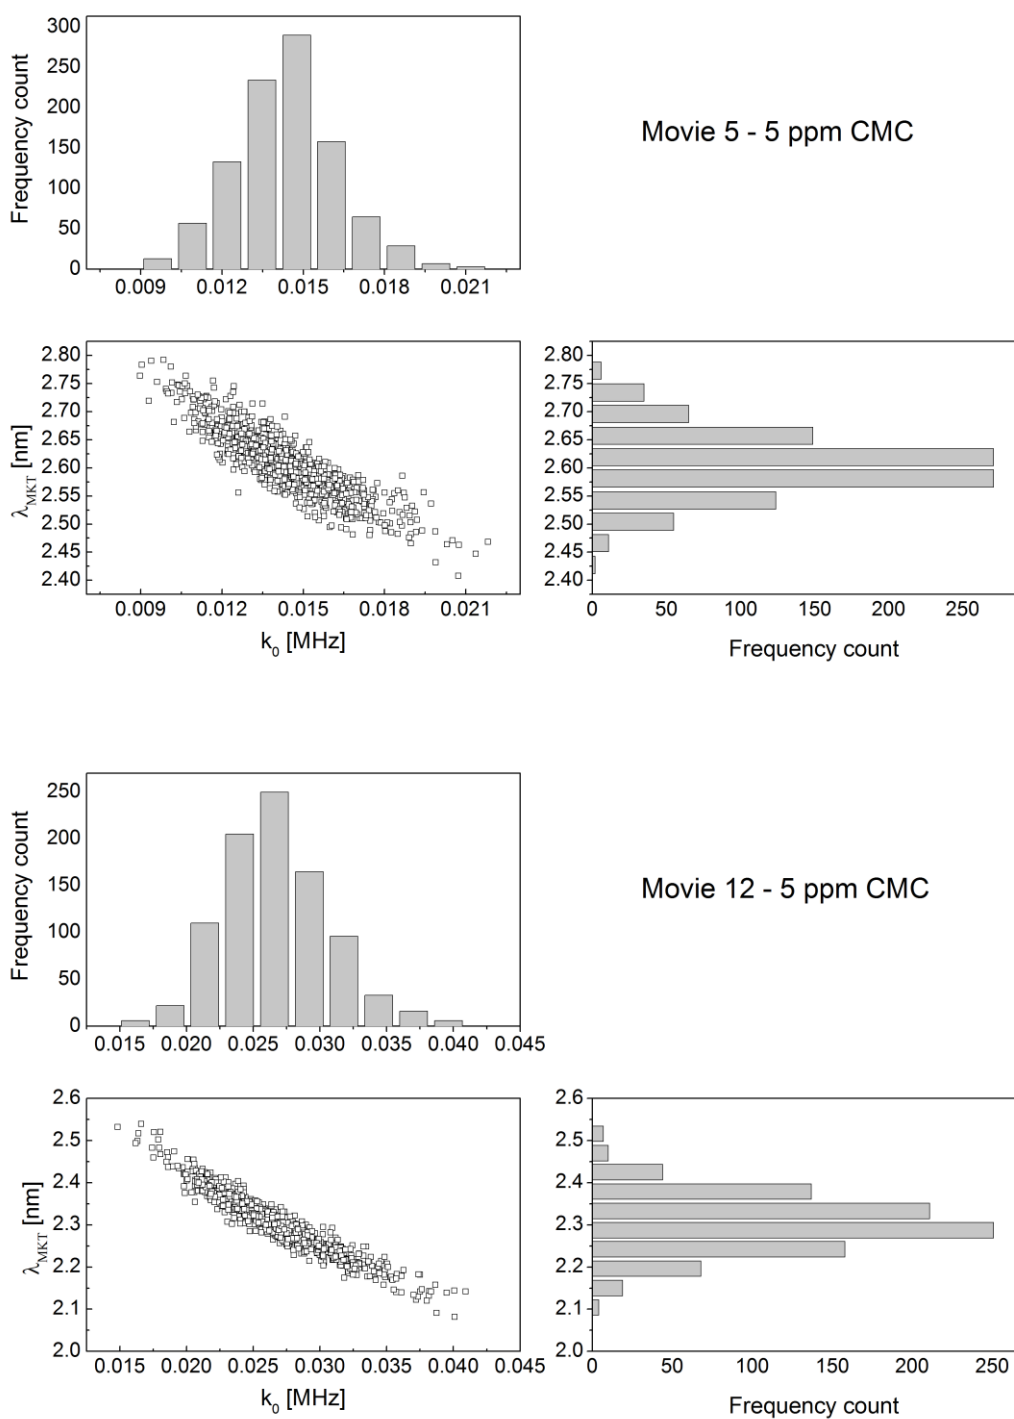

**Figure SI 4.** Distribution of  $k_0$  and  $\lambda$  parameters determined using G-Dyna software for MKT fits to a bubble-surface collision for HOPG modified by adsorption of CMC from 5 mg·L<sup>-1</sup> CMC solution in 10<sup>-3</sup> M KCl at pH 9.

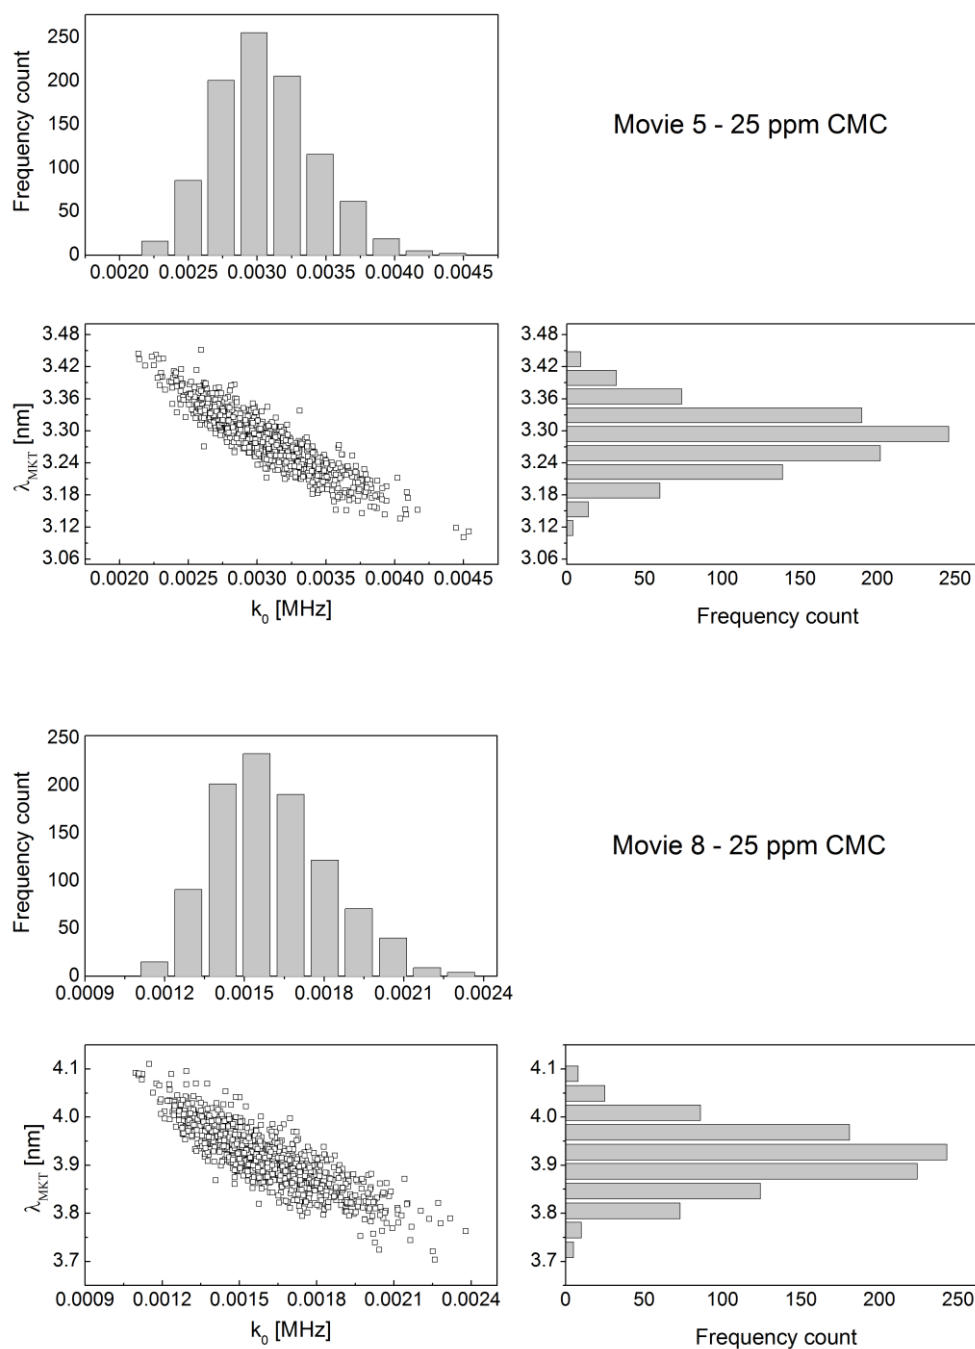

**Figure SI 5.** Distribution of  $k_0$  and  $\lambda$  parameters determined using G-Dyna software for MKT fits to a bubble-surface collision for HOPG modified by adsorption of CMC from 25 mg·L<sup>-1</sup> CMC solution in 10<sup>-3</sup> M KCl at pH 9.
